# Supplementary material
Source: Springer Nature journal article supplement (https://www.springermedizin.de/resource/supplementary/13054_2011_682_MOESM2_ESM.pdf/9709034)
Supplement: MOESM2 [file 9709034]

465 of 1776 screened patients  
developed RRT-dependent AKI

233 were excluded

- failed to meet one or more inclusion criteria
- met all inclusion criteria and at least one exclusion criterion
- declined consent

underwent randomization (n=232)

were assigned to CVVH (n=117)  
(2 were lost to follow-up for  
mortality; analyzed as alive)

were assigned to SLED (n=115)  
(3 were lost to follow-up for  
mortality; analyzed as alive)
